# Supplementary material for: Speak for yourself: usability and acceptability of audio diaries to explore physical activity, sedentary and sleep behaviours of those living with severe mental illness
Source: Springer Nature journal article supplement (doi:10.1186/s44167-024-00058-4), 2024-09-11
Supplement: MOESM1 [file 44167_2024_58_MOESM1_ESM.pdf]

Est.  
1841

YORK  
ST JOHN  
UNIVERSITY

Pina, Ilaria, Hodgson, Philip, Anderson, Kirstie and Oliver, Emily J. (2024) Speak for yourself: usability and acceptability of audio diaries to explore physical activity, sedentary and sleep behaviours of those living with severe mental illness. *Journal of Activity, Sedentary and Sleep Behaviors*, 3 (1).

Downloaded from: <https://ray.yorks.ac.uk/id/eprint/10666/>

The version presented here may differ from the published version or version of record. If you intend to cite from the work you are advised to consult the publisher's version:

<https://jassb.biomedcentral.com/articles/10.1186/s44167-024-00058-4>

Research at York St John (RaY) is an institutional repository. It supports the principles of open access by making the research outputs of the University available in digital form. Copyright of the items stored in RaY reside with the authors and/or other copyright owners. Users may access full text items free of charge, and may download a copy for private study or non-commercial research. For further reuse terms, see licence terms governing individual outputs. [Institutional Repository Policy Statement](#)

# RaY

Research at the University of York St John

For more information please contact RaY at [ray@yorks.ac.uk](mailto:ray@yorks.ac.uk)

### **Participants' self-written free-text qualitative anonymised descriptions**

Participant 1: *I am a female in my thirties with English background. I'm not religious, and have 2 children; I have lived experience of retail and familial experience of a range of mental health conditions including Complex PTSD, anxiety and depression, my son and partner also have ADHD so I understand a lot about that.*

Participant 2: *I am a transgender woman to male person, in my thirties, I was born in the United Kingdom and have lived in North east all of my life. I don't have any religions. I have lived experience in mental health in all different areas.*

Participant 3: *I am a 33 year old cis male. Who has lived experience of severe mental illness as well as using this experience to work in mental health as a peer supporter and therapeutic enabler.*

Participant 4: *I am a female in my 50's with a background in nursing, social work and counselling. I have also lived experience of mental health services for past 40 years. I'm autistic and have ADHD. I also suffer from chronic physical health problems.*

Participant 5: *I am a white British cis female. I am recently widowed. I have no religious beliefs. I have independent adult children. Regarding mental health issues within my family these are relatively minor - anxiety and depression. Our family is a big believer in the benefits of therapy, self care, communication and reflection.*

Participant 6: *I am a cis female, with a white British background. I was born in the North East of England and have lived here all of my life. I am a single parent to two daughters, and do not class myself as religious. I have lived experience of depression, anxiety, postnatal depression and living with a personality disorder.*

Participant 7: *I am a female in her 60s. Unfortunately I was assaulted and injured whilst working and have suffered with physical and mental illness since the day of the assault. I struggle with daily life and motivation. I am a caring person and enjoyed caring and supporting people. I have a grown up son and am married, my husband is now my carer.*

Participant 8: *I'm a female who is in her 50s. I am catholic religion and have lived experience of mental illness and also have family members with mental illness.*

Participant 9: *I am a white British female. I am married and have 2 children. I am not religious. My working background is in social care. I have lived experience of autism and psychosis.*
